# Supplementary material
Source: MDPI journal article supplement (https://www.mdpi.com/1424-8247/17/3/383)
Supplement: s1 [file s1]

**Table S1.** The data presented in the study.

| Table S2. The data presented in the study. |                    |                |        |               |      |                         |      |                          |               |                           |        |               |      |                                             |       |        |                                |
|--------------------------------------------|--------------------|----------------|--------|---------------|------|-------------------------|------|--------------------------|---------------|---------------------------|--------|---------------|------|---------------------------------------------|-------|--------|--------------------------------|
| No                                         | Species            | Genes detected |        | Aztreonam     |      | Aztreonam/<br>avibactam |      | Aztreonam/<br>relebactam |               | Aztreonam/<br>vaborbactam |        | Colistin      |      | Other antibiotics<br>with<br>susceptibility |       |        |                                |
|                                            |                    | NDM            | OXA-48 | MIC<br>[mg/L] | Int. | MIC<br>[mg/L]           | Int. | Change                   | MIC<br>[mg/L] | Int.                      | Change | MIC<br>[mg/L] | Int. |                                             |       | Change | MIC<br>[mg/L]                  |
| 1                                          | <i>K. pneum.</i>   | +              |        | 8             | R    | 0.19                    | S    | 5.4                      | 0.25          | S                         | 5.0    | 0.38          | S    | 4.4                                         | 0.25  | S      | TIG                            |
| 2                                          | <i>K. pneum.</i>   | +              |        | 38            | R    | 38                      | R    | 0,0                      | 0.25          | S                         | 7.2    | 0.38          | S    | 6.6                                         | 0.25  | S      |                                |
| 3                                          | <i>K. pneum.</i>   | +              | +      | 48            | R    | 0.125                   | S    | 8.6                      | 3             | I                         | 4.0    | 1             | S    | 5.6                                         | 1     | S      |                                |
| 4                                          | <i>K. pneum.</i>   | +              |        | 32            | R    | 0.094                   | S    | 8.4                      | 3             | I                         | 3.4    | 1.5           | I    | 4.4                                         | 0.063 | S      |                                |
| 5                                          | <i>K. pneum.</i>   | +              |        | 48            | R    | 0.125                   | S    | 8.6                      | 0.5           | S                         | 6.6    | 2             | I    | 4.6                                         | 1     | S      |                                |
| 6                                          | <i>K. pneum.</i>   | +              |        | 32            | R    | 0.094                   | S    | 8.4                      | 1.5           | I                         | 4.4    | 2             | I    | 4.0                                         | 0.25  | S      |                                |
| 7                                          | <i>K. pneum.</i>   | +              |        | 32            | R    | 0.19                    | S    | 7.4                      | 0.19          | S                         | 7.4    | 3             | I    | 3.4                                         | 0.25  | S      |                                |
| 8                                          | <i>K. pneum.</i>   | +              |        | 256           | R    | 0.19                    | S    | 10.4                     | 2             | I                         | 7.0    | 4             | I    | 6.0                                         | 16    | R      | TRI/SME                        |
| 9                                          | <i>K. pneum.</i>   | +              | +      | 32            | R    | 0.25                    | S    | 7.0                      | 4             | I                         | 3.0    | 6             | R    | 2.4                                         | 16    | R      |                                |
| 10                                         | <i>K. pneum.</i>   | +              | +      | 96            | R    | 0.25                    | S    | 8.6                      | 4             | I                         | 4.6    | 6             | R    | 4.0                                         | 32    | R      |                                |
| 11                                         | <i>K. pneum.</i>   | +              | +      | 128           | R    | 0.25                    | S    | 9.0                      | 4             | I                         | 5.0    | 6             | R    | 4.4                                         | 1     | S      | GEN, TRI/SME<br>TRI/SME        |
| 12                                         | <i>K. pneum.</i>   | +              |        | 32            | R    | 0.19                    | S    | 7.4                      | 6             | R                         | 2.4    | 6             | R    | 2.4                                         | 0.125 | S      |                                |
| 13                                         | <i>K. pneum.</i>   | +              |        | >256          | R    | 0.19                    | S    | 10.4                     | 6             | R                         | 5.4    | 8             | R    | 5.0                                         | 32    | R      | TIG<br>TIG                     |
| 14                                         | <i>K. pneum.</i>   | +              |        | >256          | R    | 0.25                    | S    | 10.0                     | 8             | R                         | 5.0    | 8             | R    | 5.0                                         | 0.25  | S      |                                |
| 15                                         | <i>K. pneum.</i>   | +              |        | 128           | R    | 0.38                    | S    | 8.4                      | 8             | R                         | 4.0    | 8             | R    | 4.0                                         | 16    | R      | AMI, GEN, TOB<br>AMI, GEN, TOB |
| 16                                         | <i>K. pneum.</i>   | +              |        | 96            | R    | 0.25                    | S    | 8.6                      | 8             | R                         | 3.6    | 16            | R    | 2.6                                         | 0.125 | S      |                                |
| 17                                         | <i>K. pneum.</i>   | +              |        | 128           | R    | 48                      | R    | 1.4                      | 128           | R                         | 0.0    | 48            | R    | 1.4                                         | 0.125 | S      |                                |
| 18                                         | <i>E. coli</i>     | +              |        | 96            | R    | 0.047                   | S    | 11.0                     | 0.75          | S                         | 7.0    | 0.38          | S    | 8.0                                         | 0.125 | S      |                                |
| 19                                         | <i>E. coli</i>     | +              |        | 96            | R    | 8                       | R    | 3.6                      | 6             | R                         | 4.0    | 16            | R    | 2.6                                         | 0.063 | S      |                                |
| 20                                         | <i>E. coli</i>     | +              |        | >256          | R    | 6                       | R    | 5.4                      | 8             | R                         | 5.0    | 24            | R    | 3.4                                         | 0.125 | S      |                                |
| 21                                         | <i>C. freundii</i> | +              |        | 64            | R    | 0.125                   | S    | 9.0                      | 1.5           | I                         | 5.4    | 0.094         | S    | 9.4                                         | 0.5   | S      |                                |

Int. – Interpretation; *K. pneum.* – *Klebsiella pneumoniae*; *E. coli* – *Escherichia coli*; *C. freundii* – *Citrobacter freundii*; NDM – New Delhi metallo- $\beta$ -lactamase; OXA-48 – oxacillinase-48; MIC – minimum inhibitory concentration; S – susceptible, I – susceptible, increased exposure; R – resistant; TIG – tigecycline; TRI/SME – trimethoprim/ sulfamethoxazole; GEN – gentamicin; AMI – amikacin; TOB – tobramycin
